# Supplementary material for: A Delphi Study on the Healthcare Needs of Patients with Type 1 Diabetes during the Transition from Adolescence to Adulthood: Consensus among Patients, Primary Caregivers, and Healthcare Providers
Source: MDPI journal article supplement (doi:10.3390/ijerph18137149), 2021-07-04
Supplement: s1 [file s1]

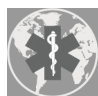

Figure S1. The questionnaire of health care needs of patients with type 1 diabetes during the transition from adolescence to adulthood

Important: 1-not at all important, 2-low important, 3-slightly important, 4-neutral, 5-moderately important, 6-very important and 7-extremely important.

| contents                                                                                                                              | important * |   |   |   |   |   |   | suggestions for revision |
|---------------------------------------------------------------------------------------------------------------------------------------|-------------|---|---|---|---|---|---|--------------------------|
|                                                                                                                                       | 1           | 2 | 3 | 4 | 5 | 6 | 7 |                          |
| 1、 Technology dimension                                                                                                               |             |   |   |   |   |   |   |                          |
| Develop a tailor-made app for type 1 diabetes                                                                                         | 1           | 2 | 3 | 4 | 5 | 6 | 7 |                          |
| Develop an app that can analyze the relationships between blood glucose changes, diet, and insulin dosage and provide recommendations | 1           | 2 | 3 | 4 | 5 | 6 | 7 |                          |
| Develop age-appropriate disease management apps or websites, such as interactive game-based designs                                   | 1           | 2 | 3 | 4 | 5 | 6 | 7 |                          |
| Develop electronic diet and exercise journals                                                                                         | 1           | 2 | 3 | 4 | 5 | 6 | 7 |                          |
| Develop an electronic journal for instant recording of symptoms, scenarios, and management of acute complications                     | 1           | 2 | 3 | 4 | 5 | 6 | 7 |                          |
| Develop electronic guidelines on food calories and substitutions                                                                      | 1           | 2 | 3 | 4 | 5 | 6 | 7 |                          |
| Establish an anonymous patient community platform                                                                                     | 1           | 2 | 3 | 4 | 5 | 6 | 7 |                          |
| Create a parent-only online chat room                                                                                                 | 1           | 2 | 3 | 4 | 5 | 6 | 7 |                          |
| Create an anonymous chat room for physicians and patients                                                                             | 1           | 2 | 3 | 4 | 5 | 6 | 7 |                          |
| Create a chat room in which the patients can choose whether to share the contents with parents                                        | 1           | 2 | 3 | 4 | 5 | 6 | 7 |                          |

|                                                                     |   |   |   |   |   |   |   |  |
|---------------------------------------------------------------------|---|---|---|---|---|---|---|--|
| Create an online portal for posting questions about type 1 diabetes | 1 | 2 | 3 | 4 | 5 | 6 | 7 |  |
| Create a type 1 diabetes knowledge network                          | 1 | 2 | 3 | 4 | 5 | 6 | 7 |  |
| other suggestions:                                                  |   |   |   |   |   |   |   |  |

| contents                                                                                                                      | important * |   |   |   |   |   |   | suggestions for revision |
|-------------------------------------------------------------------------------------------------------------------------------|-------------|---|---|---|---|---|---|--------------------------|
|                                                                                                                               | 1           | 2 | 3 | 4 | 5 | 6 | 7 |                          |
| 2、 External support dimension                                                                                                 |             |   |   |   |   |   |   |                          |
| Provide organized and relevant information on type 1 diabetes                                                                 | 1           | 2 | 3 | 4 | 5 | 6 | 7 |                          |
| Promote education on type 1 diabetes to reduce stigmatization of patients with type 1 diabetes due to public misunderstanding | 1           | 2 | 3 | 4 | 5 | 6 | 7 |                          |
| Need for a middleman to remind parents to learn to let go                                                                     | 1           | 2 | 3 | 4 | 5 | 6 | 7 |                          |
| Hold seminars for parents to share the skills of letting go                                                                   | 1           | 2 | 3 | 4 | 5 | 6 | 7 |                          |
| Mediate parent–child conflicts and enhance mutual understanding                                                               | 1           | 2 | 3 | 4 | 5 | 6 | 7 |                          |
| Provide patients with skills to communicate with parents                                                                      | 1           | 2 | 3 | 4 | 5 | 6 | 7 |                          |
| Provide more sharing opportunities among patients                                                                             | 1           | 2 | 3 | 4 | 5 | 6 | 7 |                          |
| Help develop interpersonal networks based on individual needs                                                                 | 1           | 2 | 3 | 4 | 5 | 6 | 7 |                          |
| Provide employment counseling and consultation                                                                                | 1           | 2 | 3 | 4 | 5 | 6 | 7 |                          |

|                                                                                                                             |   |   |   |   |   |   |   |  |
|-----------------------------------------------------------------------------------------------------------------------------|---|---|---|---|---|---|---|--|
|                                                                                                                             |   |   |   |   |   |   |   |  |
| Hold employment seminars to share precautions and adjustment experience during job hunting and employment                   | 1 | 2 | 3 | 4 | 5 | 6 | 7 |  |
| Promote activities organized by diabetes associations through multiple channels                                             | 1 | 2 | 3 | 4 | 5 | 6 | 7 |  |
| Diversify the activities organized by diabetes associations to meet the needs of patients from different age groups         | 1 | 2 | 3 | 4 | 5 | 6 | 7 |  |
| Provide appropriate subsidies                                                                                               | 1 | 2 | 3 | 4 | 5 | 6 | 7 |  |
| Cover insulin pump supplies in the health insurance plan                                                                    | 1 | 2 | 3 | 4 | 5 | 6 | 7 |  |
| Set up private friendly spaces in the public                                                                                | 1 | 2 | 3 | 4 | 5 | 6 | 7 |  |
| Relax the disability handbook application criteria                                                                          | 1 | 2 | 3 | 4 | 5 | 6 | 7 |  |
| Include patients with type 1 diabetes under individuals with physical illness and provide learning assistance and resources | 1 | 2 | 3 | 4 | 5 | 6 | 7 |  |
| Create type 1 diabetes card for patients                                                                                    | 1 | 2 | 3 | 4 | 5 | 6 | 7 |  |
| Change the name of the catastrophic illness card to something more positive to reduce labeling/stigmatization               | 1 | 2 | 3 | 4 | 5 | 6 | 7 |  |
| other suggestions:                                                                                                          |   |   |   |   |   |   |   |  |

| contents                                                                        | important * |   |   |   |   |   |   | suggestions for revision |
|---------------------------------------------------------------------------------|-------------|---|---|---|---|---|---|--------------------------|
|                                                                                 | 1           | 2 | 3 | 4 | 5 | 6 | 7 |                          |
| 3、 Internal support dimension                                                   |             |   |   |   |   |   |   |                          |
| Provide religious counseling resources                                          | 1           | 2 | 3 | 4 | 5 | 6 | 7 |                          |
| Assess emotional distress and provide coping skills                             | 1           | 2 | 3 | 4 | 5 | 6 | 7 |                          |
| Assess and treat stress-induced sleep disorders                                 | 1           | 2 | 3 | 4 | 5 | 6 | 7 |                          |
| Being understood and accepted                                                   | 1           | 2 | 3 | 4 | 5 | 6 | 7 |                          |
| Being recognized and encouraged for personal improvement                        | 1           | 2 | 3 | 4 | 5 | 6 | 7 |                          |
| Being understood for the fear and worry about death                             | 1           | 2 | 3 | 4 | 5 | 6 | 7 |                          |
| Organize spiritual support groups                                               | 1           | 2 | 3 | 4 | 5 | 6 | 7 |                          |
| Given appropriate autonomy to learn independence and responsibility             | 1           | 2 | 3 | 4 | 5 | 6 | 7 |                          |
| Need for primary caregiver to replace control with supervision to reduce stress | 1           | 2 | 3 | 4 | 5 | 6 | 7 |                          |
| Provide resources for psychological counseling and consultation                 | 1           | 2 | 3 | 4 | 5 | 6 | 7 |                          |
| Provide stress-management strategies                                            | 1           | 2 | 3 | 4 | 5 | 6 | 7 |                          |
| other suggestions:                                                              |             |   |   |   |   |   |   |                          |

| contents                                                                                                                             | important * |   |   |   |   |   |   | suggestions for revision |
|--------------------------------------------------------------------------------------------------------------------------------------|-------------|---|---|---|---|---|---|--------------------------|
|                                                                                                                                      | 1           | 2 | 3 | 4 | 5 | 6 | 7 |                          |
| 4、 Management dimension                                                                                                              |             |   |   |   |   |   |   |                          |
| Discuss the contents and goals of disease self-management                                                                            | 1           | 2 | 3 | 4 | 5 | 6 | 7 |                          |
| Discuss how to integrate disease care into daily life                                                                                | 1           | 2 | 3 | 4 | 5 | 6 | 7 |                          |
| Discuss diet-management strategies that meet developmental needs                                                                     | 1           | 2 | 3 | 4 | 5 | 6 | 7 |                          |
| Discuss the accuracy of information on the internet                                                                                  | 1           | 2 | 3 | 4 | 5 | 6 | 7 |                          |
| Provide step-by-step disease self-care instructions based on individual conditions                                                   | 1           | 2 | 3 | 4 | 5 | 6 | 7 |                          |
| Plan and execute specific and feasible exercise programs based on patient preferences                                                | 1           | 2 | 3 | 4 | 5 | 6 | 7 |                          |
| Enhance disease-related knowledge based on individual needs                                                                          | 1           | 2 | 3 | 4 | 5 | 6 | 7 |                          |
| Differentiate between type 1 and type 2 diabetes and develop accurate understanding of own disease                                   | 1           | 2 | 3 | 4 | 5 | 6 | 7 |                          |
| Understand changes in disease progression and increase awareness regarding health maintenance                                        | 1           | 2 | 3 | 4 | 5 | 6 | 7 |                          |
| Understand the potential time, type, and severity of complications to increase crisis awareness and improve motivation for self-care | 1           | 2 | 3 | 4 | 5 | 6 | 7 |                          |
| Understand the symptoms and care approaches for acute and chronic complications                                                      | 1           | 2 | 3 | 4 | 5 | 6 | 7 |                          |

|                                                                                                                                                   |   |   |   |   |   |   |   |  |
|---------------------------------------------------------------------------------------------------------------------------------------------------|---|---|---|---|---|---|---|--|
| Understand the purpose of treatment or medication adjustment to increase compliance                                                               | 1 | 2 | 3 | 4 | 5 | 6 | 7 |  |
| Understand the effects of hormonal changes during puberty on glycemic control to reduce frustration                                               | 1 | 2 | 3 | 4 | 5 | 6 | 7 |  |
| Understand the possible impact of pregnancy on glycemic control and clarify misconception                                                         | 1 | 2 | 3 | 4 | 5 | 6 | 7 |  |
| Understand contraceptive measures to reduce the impact of unintended conception in young girls in the context of maternal and child health        | 1 | 2 | 3 | 4 | 5 | 6 | 7 |  |
| Establish accurate knowledge of disease inheritance and clarify misconceptions to avoid unnecessary stress and fear                               | 1 | 2 | 3 | 4 | 5 | 6 | 7 |  |
| Establish links to patient medical records that can be sent to other healthcare providers for reference when necessary or in case of an emergency |   |   |   |   |   |   |   |  |
| Discuss strategies to resist food cravings to improve the effectiveness of self-control with food                                                 | 1 | 2 | 3 | 4 | 5 | 6 | 7 |  |
| Understand the possible effects and impact of substance use on disease and health                                                                 | 1 | 2 | 3 | 4 | 5 | 6 | 7 |  |
| other suggestions:                                                                                                                                |   |   |   |   |   |   |   |  |

| contents                                                                                                                        | important * |   |   |   |   |   |   | suggestions for revision |
|---------------------------------------------------------------------------------------------------------------------------------|-------------|---|---|---|---|---|---|--------------------------|
|                                                                                                                                 | 1           | 2 | 3 | 4 | 5 | 6 | 7 |                          |
| <b>5、Healthcare dimension</b>                                                                                                   |             |   |   |   |   |   |   |                          |
| 1. Healthcare providers to replace accusations with gentle reminders and to avoid words that convey indifference and impatience | 1           | 2 | 3 | 4 | 5 | 6 | 7 |                          |
| 2. Understand the respective concerns and needs of the primary caregiver and the patient during physician consultation          | 1           | 2 | 3 | 4 | 5 | 6 | 7 |                          |
| 3. Provide practice opportunities when delivering healthcare instructions†                                                      | 1           | 2 | 3 | 4 | 5 | 6 | 7 |                          |
| 4. Provide private consultation space to discuss private issues                                                                 | 1           | 2 | 3 | 4 | 5 | 6 | 7 |                          |
| 5. Provide healthcare guidance that meets the cognitive development and disease needs of patients of all ages                   | 1           | 2 | 3 | 4 | 5 | 6 | 7 |                          |
| 6. Discuss topics on the transition from pediatric to adult care                                                                | 1           | 2 | 3 | 4 | 5 | 6 | 7 |                          |
| 7. Establish a multidisciplinary diagnosis and management plan and system to reduce the back and forth across departments       | 1           | 2 | 3 | 4 | 5 | 6 | 7 |                          |
| 8. Provide and discuss domestic and foreign medical resources on type 1 diabetes                                                | 1           | 2 | 3 | 4 | 5 | 6 | 7 |                          |
| 9. Provide free or subsidized regular full body examinations                                                                    | 1           | 2 | 3 | 4 | 5 | 6 | 7 |                          |
| 10. Develop virtual healthcare to reduce the impact of medical treatment on work or study                                       | 1           | 2 | 3 | 4 | 5 | 6 | 7 |                          |
| other suggestions:                                                                                                              |             |   |   |   |   |   |   |                          |
